# Supplementary material
Source: Springer Nature journal article supplement (https://www.springermedizin.de/resource/supplementary/12963_2013_226_MOESM1_ESM.pdf/9572404)
Supplement: MOESM1 [file 9572404]

## Appendix: Formulae for attributing mortality risk to the Canadian population by BMI category

By taking into account BMI prevalence ( $Q_i$ ) and the relative risk of dying ( $RR_{ij}$ ) for each BMI category relative to the normal weight category, the age-specific mortality rates for the total Canadian population ( $R_t$ ) are decomposed into mortality rates by BMI class. Based on the assumption that the sum of BMI prevalence across all BMI categories ( $N$ ) is equal to 1 ( $\sum_{i=1}^N Q_i = 1$ ) for each sex-age-group combination, the mortality rates for the reference category ( $R_j$ , normal weight) and for all other BMI categories ( $R_i$ ) are expressed as

$$R_j = R_t \left\{ \left(1 - \sum_{i \neq j}^N Q_i\right) + \sum_{i \neq j}^N RR_{ij} Q_i \right\}^{-1} \quad (5)$$

$$R_i = RR_{ij} R_t \left\{ \left(1 - \sum_{i \neq j}^N Q_i\right) + \sum_{i \neq j}^N RR_{ij} Q_i \right\}^{-1} \quad (6)$$
